# Supplementary material for: Pharmacological Preconditioning with Vitamin C Attenuates Intestinal Injury via the Induction of Heme Oxygenase-1 after Hemorrhagic Shock in Rats
Source: PubMed Central journal article supplement (PMC4057195; doi:10.1371/journal.pone.0099134), 2014-06-13
Supplement: pone.0099134.s001.pdf [file pone.0099134.s001.pdf]

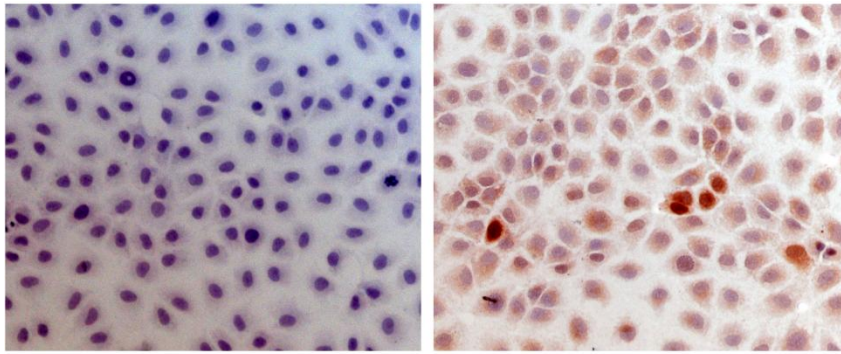

Control

VitC

**Supplement 2. Vitamin C (VitC) induced heme oxygenase (HO)-1 expression in IEC-6 intestinal epithelial cell.** The IEC-6 cells were treated with treated NS (Control) or VitC for 24 hours (hrs), the immunocytochemistry was performed using DAB staining. The brown staining indicated HO-1 expression.
