# Supplementary material for: Pharmacological Preconditioning with Vitamin C Attenuates Intestinal Injury via the Induction of Heme Oxygenase-1 after Hemorrhagic Shock in Rats
Source: PubMed Central journal article supplement (PMC4057195; doi:10.1371/journal.pone.0099134), 2014-06-13
Supplement: pone.0099134.s002.pdf [file pone.0099134.s002.pdf]

**Table 1. Sequences of the upstream and downstream primers used in this study.**

| <b>Gene</b>    | <b>Primer Sequences (5'→3')</b> |                        |
|----------------|---------------------------------|------------------------|
| TNF- $\alpha$  | upper                           | CCCAATCTGTGTCCTTCTAACT |
|                | lower                           | CACTACTTCAGCGTCTCGTGT  |
| IL-6           | upper                           | CAAAGCCAGAGTCATTCAAGC  |
|                | lower                           | GGTCCTTAGCCACTCCTTCTGT |
| $\beta$ -actin | upper                           | GCGCTCGTCGTCGACAACGG   |
|                | lower                           | GTGTGGTGCCAAATCTTCTCC  |
